# Supplementary material
Source: PubMed Central journal article supplement (PMC3858534)
Supplement: NIHMS533117-supplement-1.pdf [file NIHMS533117-supplement-1.pdf]

Figure 1S

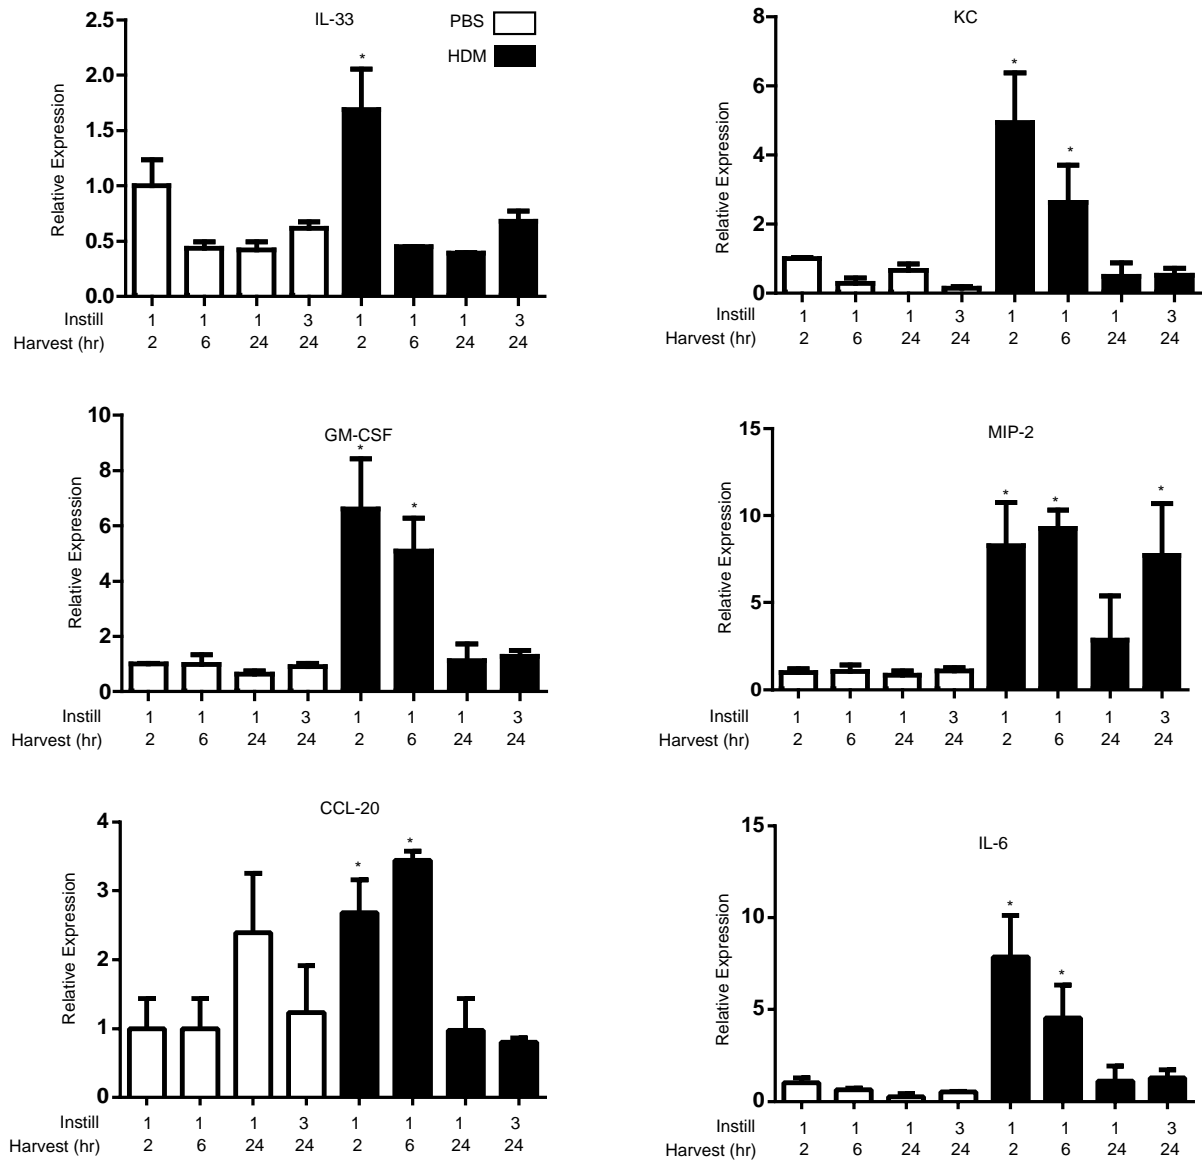

*Supplemental Figure 1: Pro-inflammatory mediator mRNA expression analysis following HDM exposure.* BALB/c mice were exposed to a single dose of either PBS or HDM and harvested 2, 6, or 24 h following challenge. Additionally, mice were challenged for three consecutive days and harvested 24 h following the 3<sup>rd</sup> challenge. mRNA isolated from homogenized lung tissue was analyzed for expression of IL-33, GM-CSF, CCL20, KC, MIP-2, and IL-6. Data represent 5 mice/group/time point. \* p < 0.05 (ANOVA) compared to the PBS group at the same time point.

Figure 2S

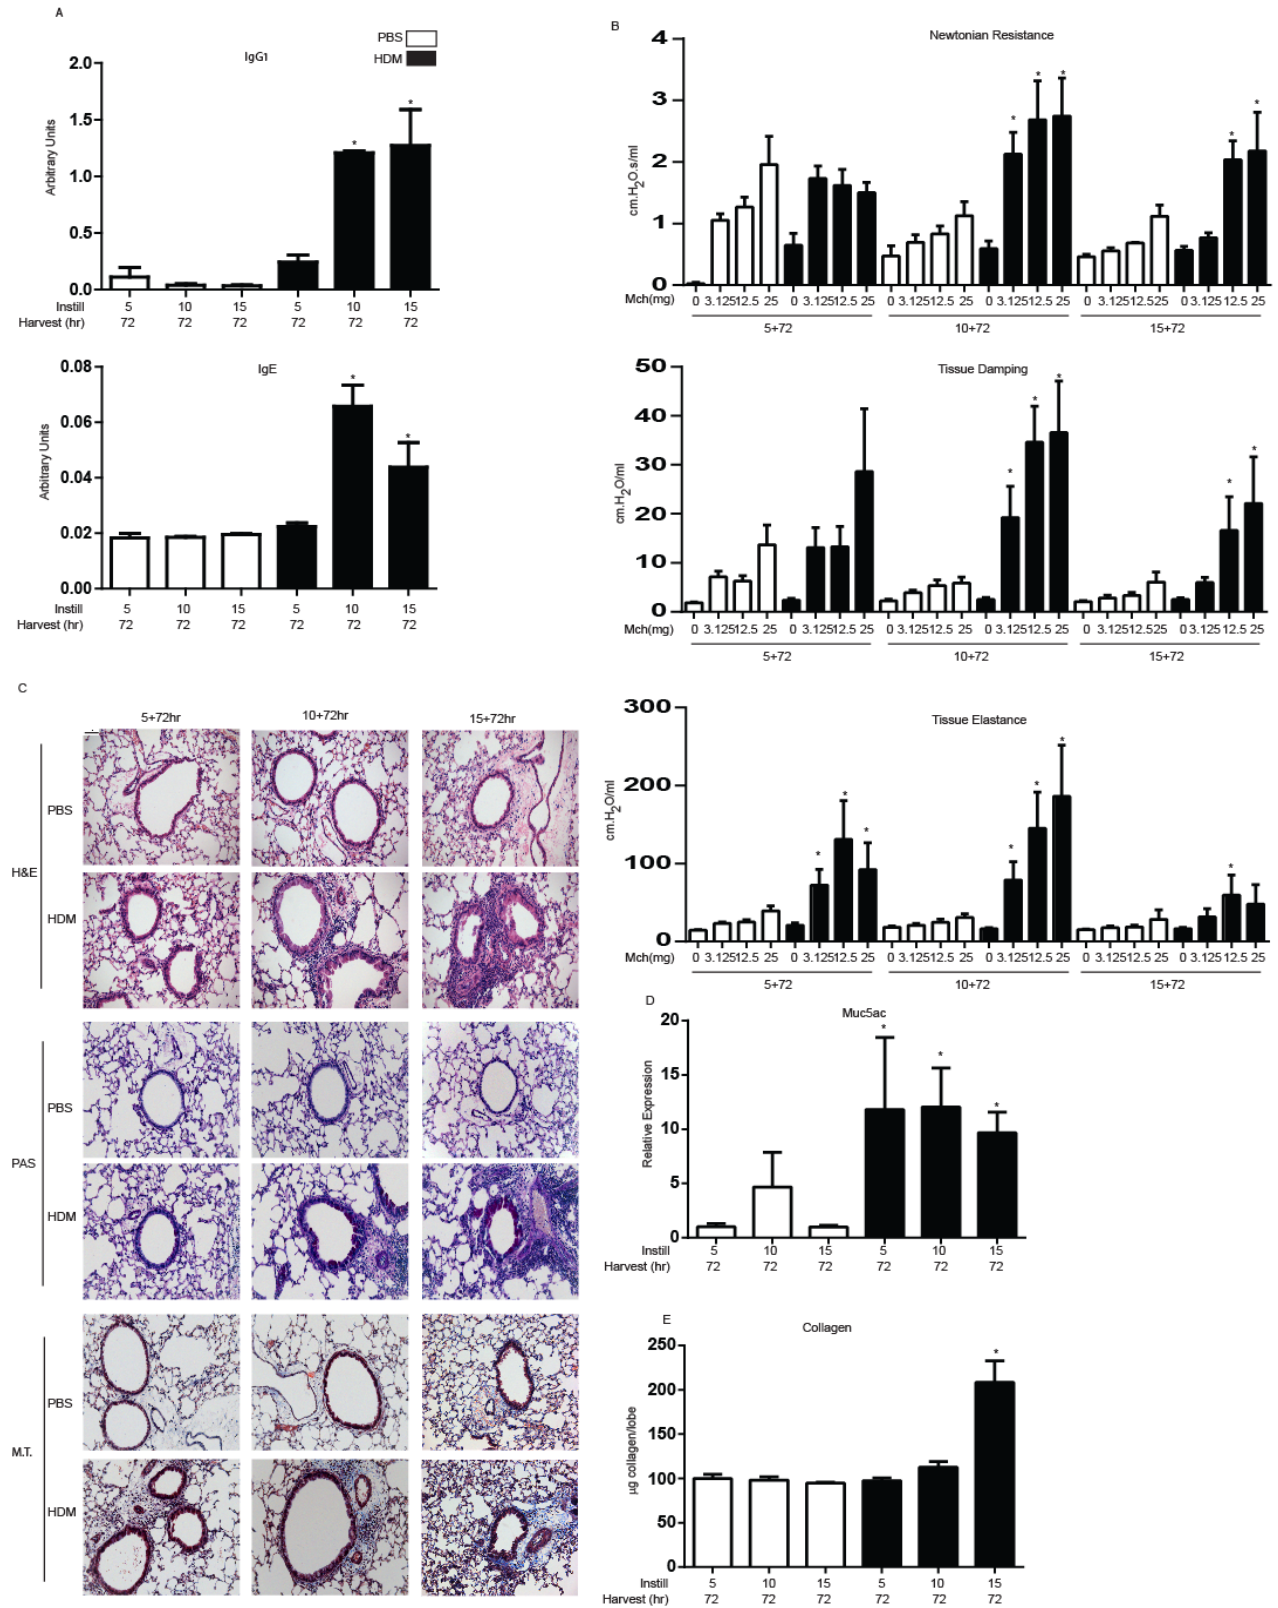

*Supplemental Figure 2: Effects of Repeated HDM Exposure on HDM-specific IgG1 and IgE, AHR and airways remodeling:* BALB/c mice were exposed to HDM and harvested at the indicated time points. (A) Assessment of total IgG1 and IgE in serum. (B) Assessment of airway hyperresponsiveness in response to increasing doses (3.125, 12.5, and 25 mg) of methacholine via forced oscillation mechanics. Parameters measured were Newtonian Resistance (Rn), Tissue Damping (G) and Tissue Elastance (H). (C) Histopathological analysis of inflammation (H&E), mucus metaplasia (PAS) and peri-bronchiolar collagen deposition (M.T.) in mice exposed to HDM for the indicated times. scale bar=50µm. (D) Analysis of Muc5ac mRNA expression in homogenized lung tissue. Data were normalized to cyclophilin and are presented as relative expression. (E) Quantification of collagen from the upper right lobe. Data represent 5 mice/group/time point. \*  $p < 0.05$  (ANOVA) compared to the PBS group at the same time point.
